# Supplementary material
Source: MDPI journal article supplement (https://www.mdpi.com/2073-4344/8/9/400)
Supplement: s1 [file s1]

Supplementary Materials: Biosynthesis of Nylon 12 Monomer, ω-Aminododecanoic Acid Using Artificial
Self-Sufficient P450, AlkJ and ω-TA

Md Murshidul Ahsan 1, Mahesh D. Patil 2, Hyunwoo Jeon 2, Sihyong Sung 2, Chung Taeowan 1 and Hyungdon Yun 2,*

1. Nucleotide Sequences of AbkCYP153A13BM3CPR

5’_CATATGTCAACGAGTTCAAGTACAAGTAATGACATTCAGGCAAAAATAATAAACGCCACATCTAAAGTCGTCCCAATGCATCTGCAGATCAAAGCATTAAAAAACCTGATGAAGGTGAAACGGAAGACAATTGGCACTTCCCGCCCACAGGTGCATTTTGTTGAAACCGACTTGCCTGACGTGAATGATTTGGCGATAGAAGATATCGATACGAGCAACCCTTTTTTATACCGACAAGGTAAAGCGAATGCCTACTTTAAGCGGTTGCGTGATGAAGCGCCGGTCCACTATCAGAAAAATTCTGCTTTTGGGCCGTTCTGGTCGGTTACAAGGTACGAAGATATTGTCTTCGTAGACAAGAGCCATGATCTATTTTCAGCCGAGCCCCAAATTATTCTCGGTGACCCTCCGGAAGGCCTGTCTGTTGAAATGTTCATCGCTATGGATCCGCCCAAGCACGACGTACAGCGTCGGGCAGTCCAGGGTGTTGTTGCGCCTAAAAATCTGAAAGAAATGGAGGGACTGATCCGCAAAAGAACCGGGGACGTACTGGACAGCCTGCCGTTGGACACTCCGTTTAACTGGGTGCCTGTGGTGTCAAAAGAACTGACCGGGCGGATGCTTGCTTCACTGTTAGATTTCCCGTATGACGAACGCGAAAAACTGGTTGGTTGGAGTGATCGACTCTCCGGCGCGTCCTCGGCAACCGGCGGCGAGTTTACTAATGAAGATGTATTTTTTGATGACGCTGCAGATATGGCCTGGGCTTTCTCCAAACTTTGGCGTGATAAAGAGGCCCGTCAAAAAGCAGGTGAAGAGCCGGGCTTCGATCTTATCTCTATGCTTCAGAGTAATGAAGACACAAAAGATCTGATTAATCGTCCTTTAGAATTCATTGGTAATCTCGCGTTACTGATTGTTGGAGGTAATGATACTACGCGTAACTCAATGAGCGGGGGAGTGCTGGCTCTCAATCAGTTCCCCGAGCAGTTTGAGAAGCTAAAAGCGAACCCAAAGCTGATCCCCAATATGGTCTCTGAAATCACTCGCTGGCAAACCCCGCTTGCATATATGCGCCGTGTTGCCAAGCAGGATGTGGAGCTGAATGGACAGACCATCAAGAAGGGTGATCGCGTACTGATGTGGTATGCGAGCGGCAACCAGGATGAGAGAAAATTCGAGAATCCAGAGCAATTTATTATAGATCGCAAAGATACGCGTAACCATGTGAGCTTTGGTTATGGAGTTCACAGATGTATGGGCAACCGCCTTGCCGAACTGCAGCTGCGTATTCTGTGGGAAGAGCTTTTGCCACGCTTTGAAAACATAGAAGTAATTGGTGAACCGGAGAGAGTGCAATCGAATTTTGTAAGGGGGTATTCCAAAATGATGGTTAAATTGACGGCAAAAAAAA**AA**GCT**T**TATCGAAAAAAATTCCGCTTGGCGGTATTCCTTCACCTAGCACTGAACAGTCTGCTAAAAAAGTACGCAAAAAGGCAGAAAACGCTCATAATACGCCGCTGCTTGTGCTATACGGTTCAAATATGGGAACAGCTGAAGGAACGGCGCGTGATTTAGCAGATATTGCAATGAGCAAAGGATTTGCACCGCAGGTCGCAACGCTTGATTCACACGCCGGAAATCTTCCGCGCGAAGGAGCTGTATTAATTGTAACGGCGTCTTATAACGGTCATCCGCCTGATAACGCAAAGCAATTTGTCGACTGGTTAGACCAAGCGTCTGCTGATGAAGTAAAAGGCGTTCGCTACTCCGTATTTGGATGCGGCGATAAAAACTGGGCTACTACGTATCAAAAAGTGCCTGCTTTTATCGATGAAACGCTTGCCGCTAAAGGGGCAGAAAACATCGCTGACCGCGGTGAAGCAGATGCAAGCGACGACTTTGAAGGCACATATGAAGAATGGCGTGAACATATGTGGAGTGACGTAGCAGCCTACTTTAACCTCGACATTGAAAACAGTGAAGATAATAAATCTACTCTTTCACTTCAATTTGTCGACAGCGCCGCGGATATGCCGCTTGCGAAAATGCACGGTGCGTTTTCAACGAACGTCGTAGCAAGCAAAGAACTTCAACAGCCAGGCAGTGCACGAAGCACGCGACATCTTG*AAATTGAACTTCCAAAAGAAGCATCTTATCA*AGAAGGAGATCATTTAGGTGTTATTCCTCGCAACTATGAAGGAATAGTAAACCGTGTAACAGCAAGGTTCGGCCTAGATGCATCACAGCAAATCCGTCTGGAAGCAGAAGAAGAAAAATTAGCTCATTTGCCACTCGCTAAAACAGTATCCGTAGAAGAGCTTCTGCAATACGTGGAGCTTCAAGATCCTGTTACGCGCACGCAGCTTCGCGCAATGGCTGCTAAAACGGTCTGCCCGCCGCATAAAGTAGAGCTTGAAGCCTTGCTTGAAAAGCAAGCCTACAAAGAACAAGTGCTGGCAAAACGTTTAACAATGCTTGAACTGCTTGAAAAATACCCGGCGTGTGAAATGAAATTCAGCGAATTTATCGCCCTTCTGCCAAGCATACGCCCGCGCTATTACTCGATTTCTTCATCACCTCGTGTCGATGAAAAACAAGCAAGCATCACGGTCAGCGTTGTCTCAGGAGAAGCGTGGAGCGGATATGGAGAATATAAAGGAATTGCGTCGAACTATCTTGCCGAGCTGCAAGAAGGAGATACGATTACGTGCTTTATTTCCACACCGCAGTCAGAATTTACGCTGCCAAAAGACCCTGAAACGCCGCTTATCATGGTCGGACCGGGAACAGGCGTCGCGCCGTTTAGAGGCTTTGTGCAGGCGCGCAAACAGCTAAAAGAACAAGGACAGTCACTTGGAGAAGCACATTTATACTTCGGCTGCCGTTCACCTCATGAAGACTATCTGTATCAAGAAGAGCTTGAAAACGCCCAAAGCGAAGGCATCATTACGCTTCATACCGCTTTTTCTCGCATGCCAAATCAGCCGAAAACATACGTTCAGCACGTAATGGAACAAGACGGCAAGAAATTGATTGAACTTCTTGATCAAGGAGCGCACTTCTATATTTGCGGAGACGGAAGCCAAATGGCACCTGCCGTTGAAGCAACGCTTATGAAAAGCTATGCTGACGTTCACCAAGTGAGTGAAGCAGACGCTCGCTTATGGCTGCAGCAGCTAGAAGAAAAAGGCCGATACGCAAAAGACGTGTGGGCTGGGCTCGAG_3’

2. Nucleotide Sequences of AbkCYP153A13Bc21CPR

5’_*CATATG*TCAACGAGTTCAAGTACAAGTAATGACATTCAGGCAAAAATAATAAACGCCACATCTAAAGTCGTCCCAATGCATCTGCAGATCAAAGCATTAAAAAACCTGATGAAGGTGAAACGGAAGACAATTGGCACTTCCCGCCCACAGGTGCATTTTGTTGAAACCGACTTGCCTGACGTGAATGATTTGGCGATAGAAGATATCGATACGAGCAACCCTTTTTTATACCGACAAGGTAAAGCGAATGCCTACTTTAAGCGGTTGCGTGATGAAGCGCCGGTCCACTATCAGAAAAATTCTGCTTTTGGGCCGTTCTGGTCGGTTACAAGGTACGAAGATATTGTCTTCGTAGACAAGAGCCATGATCTATTTTCAGCCGAGCCCCAAATTATTCTCGGTGACCCTCCGGAAGGCCTGTCTGTTGAAATGTTCATCGCTATGGATCCGCCCAAGCACGACGTACAGCGTCGGGCAGTCCAGGGTGTTGTTGCGCCTAAAAATCTGAAAGAAATGGAGGGACTGATCCGCAAAAGAACCGGGGACGTACTGGACAGCCTGCCGTTGGACACTCCGTTTAACTGGGTGCCTGTGGTGTCAAAAGAACTGACCGGGCGGATGCTTGCTTCACTGTTAGATTTCCCGTATGACGAACGCGAAAAACTGGTTGGTTGGAGTGATCGACTCTCCGGCGCGTCCTCGGCAACCGGCGGCGAGTTTACTAATGAAGATGTATTTTTTGATGACGCTGCAGATATGGCCTGGGCTTTCTCCAAACTTTGGCGTGATAAAGAGGCCCGTCAAAAAGCAGGTGAAGAGCCGGGCTTCGATCTTATCTCTATGCTTCAGAGTAATGAAGACACAAAAGATCTGATTAATCGTCCTTTAGAATTCATTGGTAATCTCGCGTTACTGATTGTTGGAGGTAATGATACTACGCGTAACTCAATGAGCGGGGGAGTGCTGGCTCTCAATCAGTTCCCCGAGCAGTTTGAGAAGCTAAAAGCGAACCCAAAGCTGATCCCCAATATGGTCTCTGAAATCACTCGCTGGCAAACCCCGCTTGCATATATGCGCCGTGTTGCCAAGCAGGATGTGGAGCTGAATGGACAGACCATCAAGAAGGGTGATCGCGTACTGATGTGGTATGCGAGCGGCAACCAGGATGAGAGAAAATTCGAGAATCCAGAGCAATTTATTATAGATCGCAAAGATACGCGTAACCATGTGAGCTTTGGTTATGGAGTTCACAGATGTATGGGCAACCGCCTTGCCGAACTGCAGCTGCGTATTCTGTGGGAAGAGCTTTTGCCACGCTTTGAAAACATAGAAGTAATTGGTGAACCGGAGAGAGTGCAATCGAATTTTGTAAGGGGGTATTCCAAAATGATGGTTAAATTGACGGCAAAAAAAAAAGCTTTAAAGATTAGGATTCTACCCCGAAAACAAACTATTAGTCATCCTACTGTTCTTGCACCTACAGAGGACAAGCTGAAAAACGATGAAATTAAGCAACATGTCCAGAAGACACCTTCTATTATTGGGGCCGATAATCTTTCACTTCTTGTTCTGTATGGCTCGGATACAGGTGTAGCAGAAGGTATTGCAAGAGAATTAGCAGATACAGCTAGTTTAGAAGGAGTTCAAACGGAAGTGGTAGCTCTTAACGATCGAATTGGAAGTTTGCCAAAAGAAGGAGCGGTACTTATTGTGACTTCTTCTTATAATGGAAAACCGCCAAGTAATGCAGGGCAGTTTGTGCAATGGTTGGAGGAACTAAAACCAGATGAGCTAAAAGGGGTTCAATACGCAGTTTTTGGTTGTGGAGATCATAATTGGGCTAGTACCTACCAACGGATTCCAAGATACATTGATGAGCAAATGGCTCAAAAAGGAGCAACAAGATTTTCTAAACGCGGAGAAGCAGATGCAAGTGGTGATTTCGAGGAACAGCTTGAGCAATGGAAACAAAACATGTGGTCTGATGCGATGAAGGCATTTGGATTGGAGCTCAACAAAAATATGGAAAAAGAGCGCAGTACTTTGAGTCTGCAATTTGTCAGTCGTCTTGGAGGATCTCCTCTTGCACGAACATATGAAGCAGTTTATGCATCTATACTAGAAAATCGTGAACTTCAATCATCCAGCAGTGATAGAAGTACACGACATATCGAGGTATCTTTGCCAGAAGGCGCTACATATAAAGAAGGAGATCACCTTGGAGTGTTGCCAGTTAATAGCGAGAAAAATATCAACCGAATTTTAAAACGTTTTGGATTAAATGGGAAGGATCAAGTTATACTGAGTGCAAGTGGACGAAGTATAAATCACATACCTTTAGACAGTCCTGTTAGTTTATTGGCCCTTCTTAGTTATAGTGTTGAAGTTCAAGAAGCTGCCACTCGAGCACAAATACGAGAAATGGTAACATTCACAGCATGTCCTCCTCATAAAAAAGAATTGGAAGCATTATTAGAAGAAGGAGTTTATCATGAACAAATATTAAAGAAACGGATTTCAATGTTGGACCTTCTTGAAAAGTATGAGGCTTGTGAAATCCGATTTGAACGCTTTTTAGAACTTCTTCCTGCGCTCAAACCGCGTTACTATTCTATTTCAAGCTCTCCACTCGTTGCACACAATCGTCTGAGCATTACGGTCGGTGTTGTTAATGCGCCTGCATGGAGTGGGGAAGGGACATATGAAGGAGTCGCTTCTAATTACTTAGCTCAGCGTCATAATAAAGATGAGATTATCTGTTTCATTCGAACGCCACAATCAAACTTTGAATTACCTAAAGATCCAGAAACACCAATTATTATGGTTGGGCCAGGTACTGGAATTGCACCATTCCGTGGATTCTTGCAAGCGCGTCGTGTTCAAAAGCAAAAAGGTATGAACTTAGGACAAGCGCATCTATATTTTGGTTGTCGTCATCCTGAAAAAGATTATCTCTATCGTACAGAATTAGAAAATGATGAAAGAGATGGATTAATCTCTTTACACACAGCTTTTTCTCGTCTAGAGGGACATCCAAAAACATATGTACAGCATTTGATAAAACAAGATAGAATCAATTTAATTTCGTTATTAGATAATGGAGCTCATCTTTATATATGTGGTGATGGAAGTAAAATGGCTCCGGATGTAGAAGATACCCTTTGTCAAGCATATCAAGAAATTCATGAAGTCAGTGAACAAGAAGCAAGAAATTGGTTGGATCGTGTGCAAGATGAAGGGCGATATGGAAAAGATGTTTGGGCTGGTATAGTGCGGCCGC_3’

3. Nucleotide Sequences of AbkCYP153A13SavCPR

5’_CATATGTCAACGAGTTCAAGTACAAGTAATGACATTCAGGCAAAAATAATAAACGCCACATCTAAAGTCGTCCCAATGCATCTGCAGATCAAAGCATTAAAAAACCTGATGAAGGTGAAACGGAAGACAATTGGCACTTCCCGCCCACAGGTGCATTTTGTTGAAACCGACTTGCCTGACGTGAATGATTTGGCGATAGAAGATATCGATACGAGCAACCCTTTTTTATACCGACAAGGTAAAGCGAATGCCTACTTTAAGCGGTTGCGTGATGAAGCGCCGGTCCACTATCAGAAAAATTCTGCTTTTGGGCCGTTCTGGTCGGTTACAAGGTACGAAGATATTGTCTTCGTAGACAAGAGCCATGATCTATTTTCAGCCGAGCCCCAAATTATTCTCGGTGACCCTCCGGAAGGCCTGTCTGTTGAAATGTTCATCGCTATGGATCCGCCCAAGCACGACGTACAGCGTCGGGCAGTCCAGGGTGTTGTTGCGCCTAAAAATCTGAAAGAAATGGAGGGACTGATCCGCAAAAGAACCGGGGACGTACTGGACAGCCTGCCGTTGGACACTCCGTTTAACTGGGTGCCTGTGGTGTCAAAAGAACTGACCGGGCGGATGCTTGCTTCACTGTTAGATTTCCCGTATGACGAACGCGAAAAACTGGTTGGTTGGAGTGATCGACTCTCCGGCGCGTCCTCGGCAACCGGCGGCGAGTTTACTAATGAAGATGTATTTTTTGATGACGCTGCAGATATGGCCTGGGCTTTCTCCAAACTTTGGCGTGATAAAGAGGCCCGTCAAAAAGCAGGTGAAGAGCCGGGCTTCGATCTTATCTCTATGCTTCAGAGTAATGAAGACACAAAAGATCTGATTAATCGTCCTTTAGAATTCATTGGTAATCTCGCGTTACTGATTGTTGGAGGTAATGATACTACGCGTAACTCAATGAGCGGGGGAGTGCTGGCTCTCAATCAGTTCCCCGAGCAGTTTGAGAAGCTAAAAGCGAACCCAAAGCTGATCCCCAATATGGTCTCTGAAATCACTCGCTGGCAAACCCCGCTTGCATATATGCGCCGTGTTGCCAAGCAGGATGTGGAGCTGAATGGACAGACCATCAAGAAGGGTGATCGCGTACTGATGTGGTATGCGAGCGGCAACCAGGATGAGAGAAAATTCGAGAATCCAGAGCAATTTATTATAGATCGCAAAGATACGCGTAACCATGTGAGCTTTGGTTATGGAGTTCACAGATGTATGGGCAACCGCCTTGCCGAACTGCAGCTGCGTATTCTGTGGGAAGAGCTTTTGCCACGCTTTGAAAACATAGAAGTAATTGGTGAACCGGAGAGAGTGCAATCGAATTTTGTAAGGGGGTATTCCAAAATGATGGTTAAATTGACGGCAAAAAAAAAAGCTTTCTGTATGGCTCGGATACAGGTGTAGCAGAAGGTATTGCAAGAGAATTAGCAGATACAGCTAGTTTAGAAGGAGTTCAAACGGAAGTGGTAGCTCTTAACGATCGAATTGGAAGTTTGCCAAAAGAAGGAGCGGTACTTATTGTGACTTCTTCTTATAATGGAAAACCGCCAAGTAATGCAGGGCAGTTTGTGCAATGGTTGGAGGAACTAAAACCAGATGAGCTAAAAGGGGTTCAATACGCAGTTTTTGGTTGTGGAGATCATAATTGGGCTAGTACCTACCAACGGATTCCAAGATACATTGATGAGCAAATGGCTCAAAAAGGAGCAACAAGATTTTCTAAACGCGGAGAAGCAGATGCAAGTGGTGATTTCGAGGAACAGCTTGAGCAATGGAAACAAAACATGTGGTCTGATGCGATGAAGGCATTTGGATTGGAGCTCAACAAAAATATGGAAAAAGAGCGCAGTACTTTGAGTCTGCAATTTGTCAGTCGTCTTGGAGGATCTCCTCTTGCACGAACATATGAAGCAGTTTATGCATCTATACTAGAAAATCGTGAACTTCAATCATCCAGCAGTGATAGAAGTACACGACATATCGAGGTATCTTTGCCAGAAGGCGCTACATATAAAGAAGGAGATCACCTTGGAGTGTTGCCAGTTAATAGCGAGAAAAATATCAACCGAATTTTAAAACGTTTTGGATTAAATGGGAAGGATCAAGTTATACTGAGTGCAAGTGGACGAAGTATAAATCACATACCTTTAGACAGTCCTGTTAGTTTATTGGCCCTTCTTAGTTATAGTGTTGAAGTTCAAGAAGCTGCCACTCGAGCACAAATACGAGAAATGGTAACATTCACAGCATGTCCTCCTCATAAAAAAGAATTGGAAGCATTATTAGAAGAAGGAGTTTATCATGAACAAATATTAAAGAAACGGATTTCAATGTTGGACCTTCTTGAAAAGTATGAGGCTTGTGAAATCCGATTTGAACGCTTTTTAGAACTTCTTCCTGCGCTCAAACCGCGTTACTATTCTATTTCAAGCTCTCCACTCGTTGCACACAATCGTCTGAGCATTACGGTCGGTGTTGTTAATGCGCCTGCATGGAGTGGGGAAGGGACATATGAAGGAGTCGCTTCTAATTACTTAGCTCAGCGTCATAATAAAGATGAGATTATCTGTTTCATTCGAACGCCACAATCAAACTTTGAATTACCTAAAGATCCAGAAACACCAATTATTATGGTTGGGCCAGGTACTGGAATTGCACCATTCCGTGGATTCTTGCAAGCGCGTCGTGTTCAAAAGCAAAAAGGTATGAACTTAGGACAAGCGCATCTATATTTTGGTTGTCGTCATCCTGAAAAAGATTATCTCTATCGTACAGAATTAGAAAATGATGAAAGAGATGGATTAATCTCTTTACACACAGCTTTTTCTCGTCTAGAGGGACATCCAAAAACATATGTACAGCATTTGATAAAACAAGATAGAATCAATTTAATTTCGTTATTAGATAATGGAGCTCATCTTTATATATGTGGTGATGGAAGTAAAATGGCTCCGGATGTAGAAGATACCCTTTGTCAAGCATATCAAGAAATTCATGAAGTCAGTGAACAAGAAGCAAGAAATTGGTTGGATCGTGTGCAAGATGAAGGGCGATATGGAAAAGATGTTTGGGCTGGTATAGTGCGGCCGC_3’

**Table S1.** Primers used for the construction of ArtssP450s.

| **Name** | **Sequence (5’-3’)** |
| --- | --- |
| 153A13-F (*Nde*I) | ATAT CATATG TCAACGAGTTCAAGTACAA |
| 153A13-R (*Xho*I) | ATATCTCGAGTTTTTTTGCCGTCAATTTAACCATCA |
| Bc21_CPR_F | ATTAAAGCTTTAAAGATTAGGATTCTACCCCG |
| Bc21_CPR_R | ATTAGCGGCCGCACTATACCAGCCCAAACATC |
| Sav_CPR_F | ATTAAAGCTTTACGGGCTCGTCAAGAGCAC |
| Sav_CPR_R | TAATGCGGCCGCGGCGAAGACGTCCTGTTG |
| BM3_CPR_F | ATTAAAGCTTTATCGAAAAAAATTCCGCTT |
| BM3_M2_R | GATAAGATGCTTCTTTTGGAAGTTC |
| BM3_M3_F | CAAAAGAAGCATCTTATCAAGAAGG |
| BM3_CPR_R | TAATCTCGAGCCCAGCCCACACGTCTTT |
| 153A13-Frd (*Nde*I) | ATTAAAGCTTATGTCAACGAGTTCAAGT |
| 153A13-Rev (*Hind*III) | ATTAAAGCTTTTATTTTTTTGCCGTCAA |
| pET24ma_AlkJ_F | TCGCGGATCCATGTACGACTATATAATCGTTGGTG |
| pET24ma_AlkJ_R | GGTGCTCGAGTTACATGCAGACAGCTATCATGGC |
| pETDuet1_PPTA_F | ATATCATATGATGGCTACTATCACCAACCACATG |
| pETDuet1 _PPTA_R | ATAT CTCGAGTTAGGCGCTTTTCATCAGGC |
| AlkJ_M2 _F | ATTACTCGAGATGTACGACTATATAATC |
| AlkJ_M2 _R | TAATTTAATTAACTACATGCAGACAGCTATC |

* Restriction sites were underlined.

**Table S2.** Retention time of the substrates and products by Gas Chromatography (nonpolar capillary column-5% phenyl methyl siloxane capillary, HP-5) as described in Materials and Methods.

| **Substrate/ Product** | **Retention time [min]** |
| --- | --- |
| *Dodecanoic acid | 15.90 |
| *ω-Hydroxy dodecanoic acid | 19.64 |
| **ω-Aminododecanoic acid | 16.02 |

*Derivatized with BSTFA.; **Derivatized with MSTFA.

| **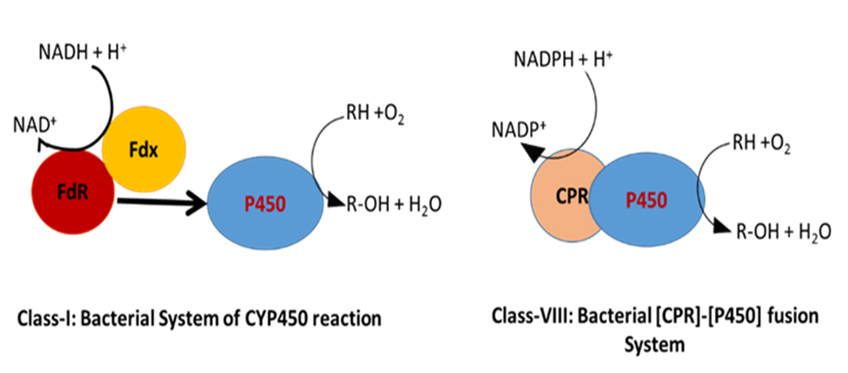** |
| --- |

**Figure S1.** Electron transportation system bacterial CYP.**A.** class I, and **B.** class VIII.

| **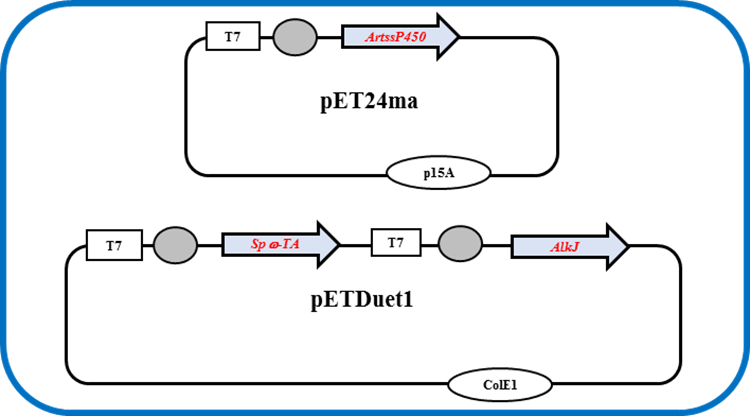** |
| --- |

**Figure S2.** Co-expression plasmid diagram for the synthesis of ω-AmDDA.

| **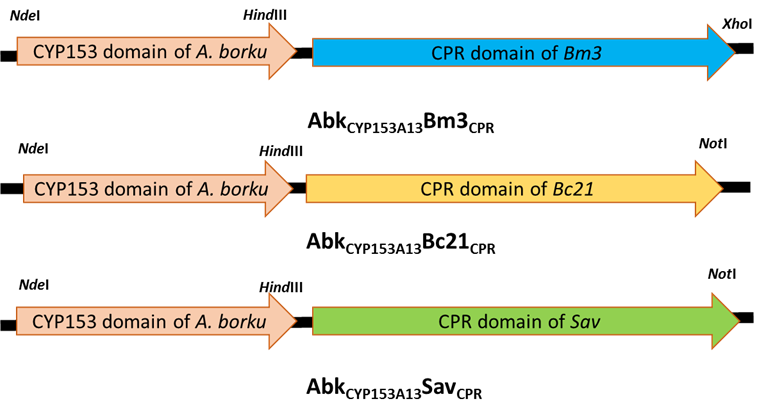** |
| --- |

**Figure S3.** Schematic diagram of ArtssP450s construction strategy using restriction sites into pET24ma vector.

| **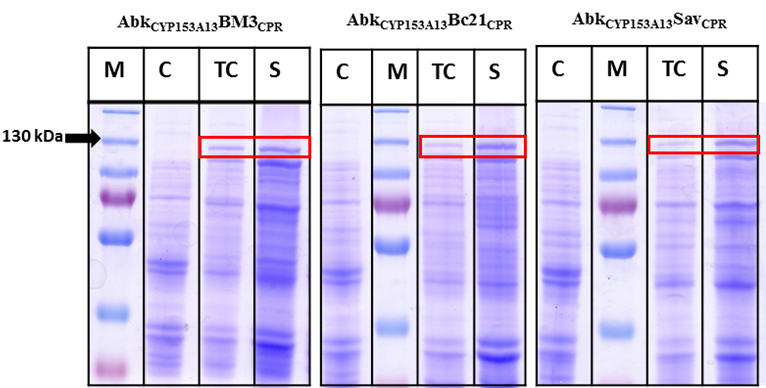** |
| --- |

**Figure S4.** SDS PAGE analysis of recombinant *E. coli* expressing ArtssP450s (~120 kDa). C, control; M, Marker; TC, total cells; SP, soluble proteins. Protein expression was carried out using 0.1 mM IPTG, 0.1 mM FeSO4, and 0.5 mM 5-ALA at 20 °C and 170 rpm.

**
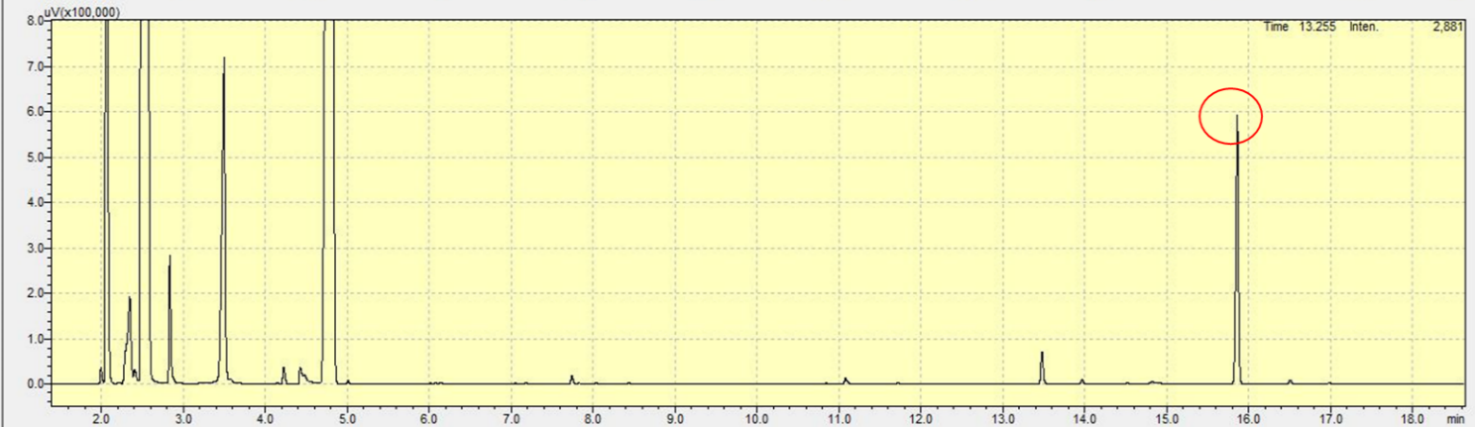
**

**Figure S5.** GC chromatogram of the chemical standard of DDA. The peak at 13.5 min is the internal standard decanoic acid.


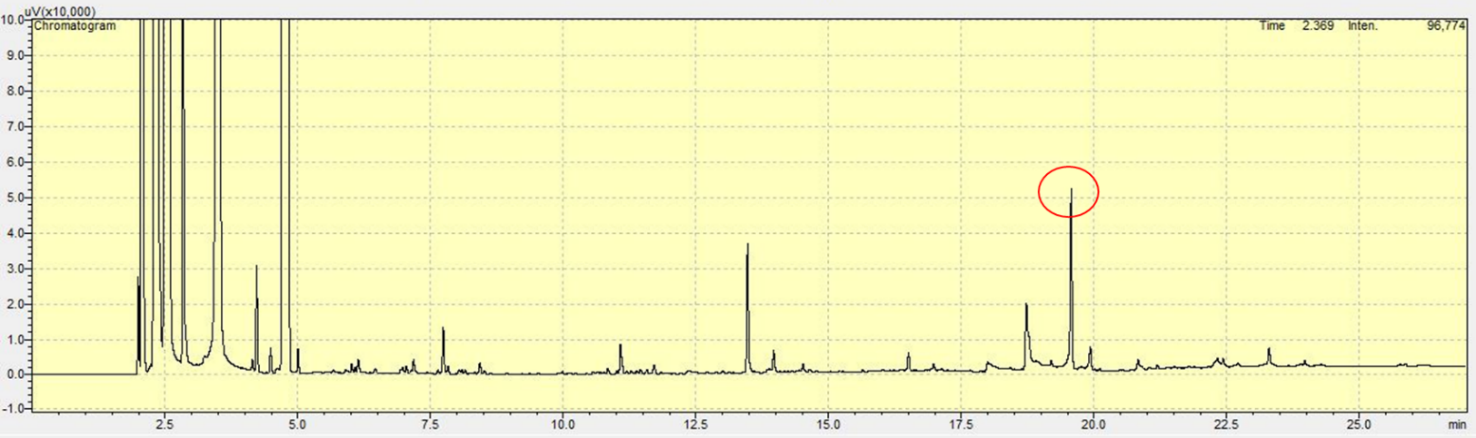


**Figure S6.** GC chromatogram of the chemical standard of ω-AmDDA. The peak at 13.5 min is the internal standard decanoic acid.


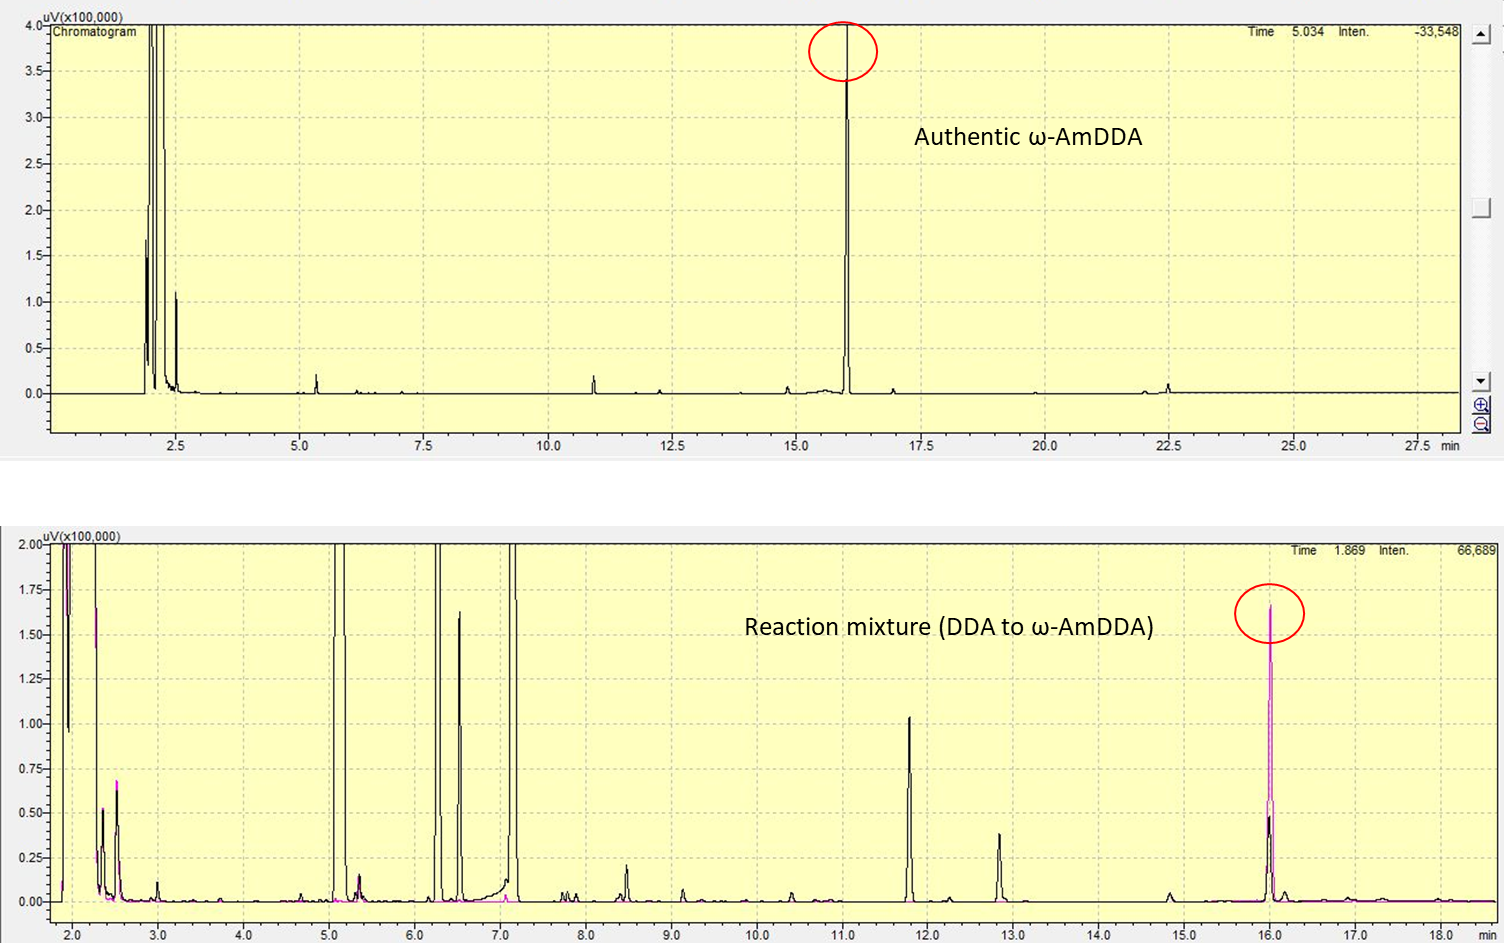


**Figure S7.** GC chromatogram of authentic ω-AmDDA; and Reaction mixture of DDA to ω-AmDDA.


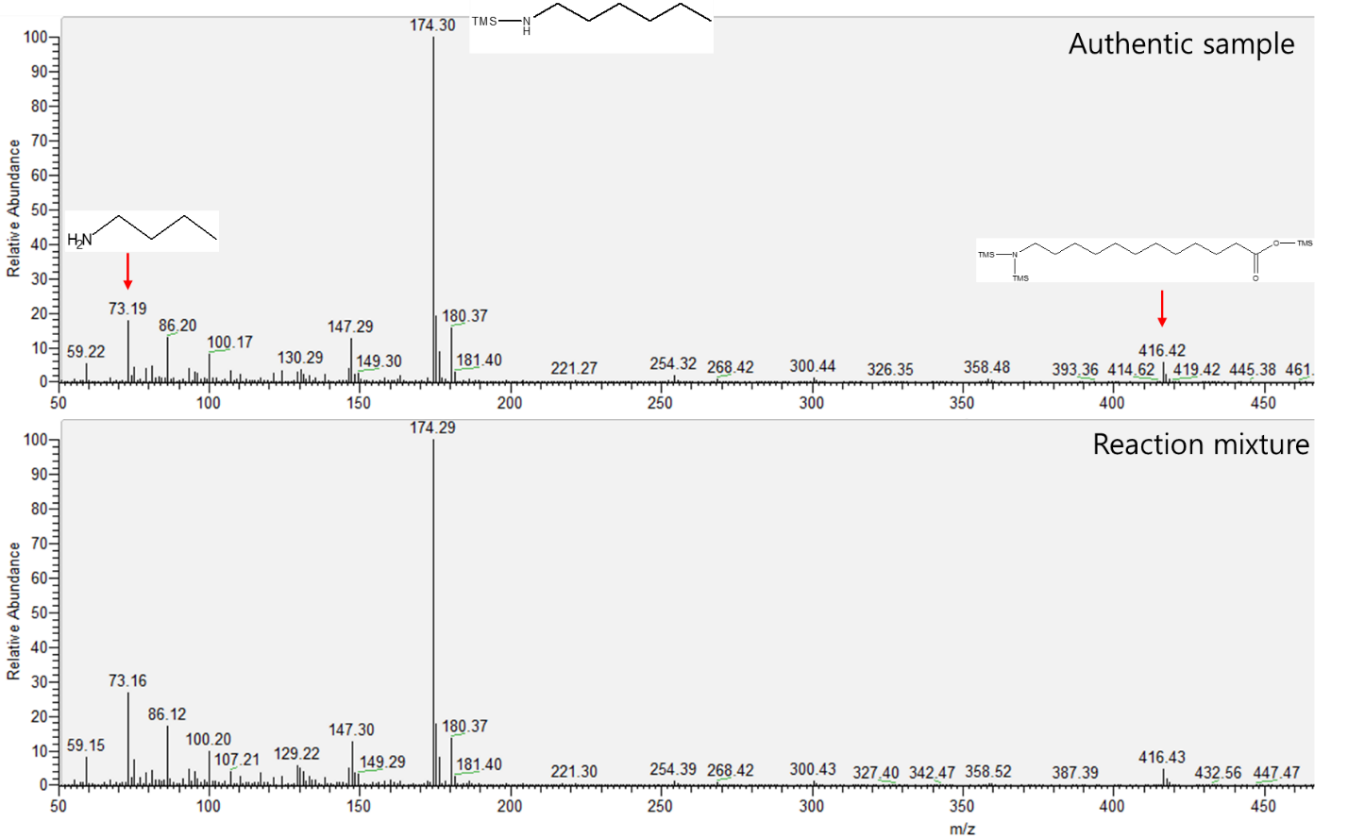


**Figure S8.** GC/MS analysis of authentic ω-AmDDA; and Reaction mixture of DDA to ω-AmDDA.
